# Supplementary material
Source: PubMed Central journal article supplement (PMC9508682)

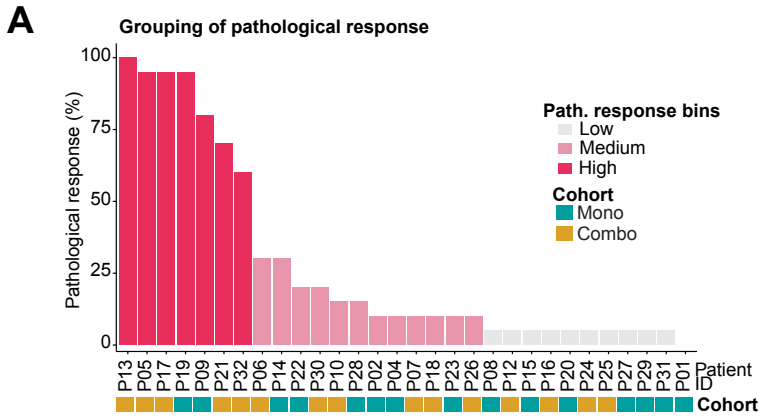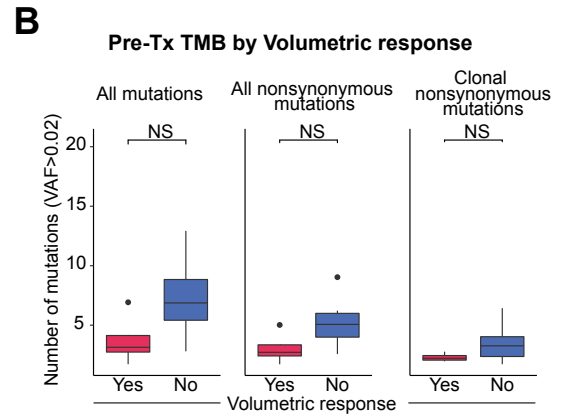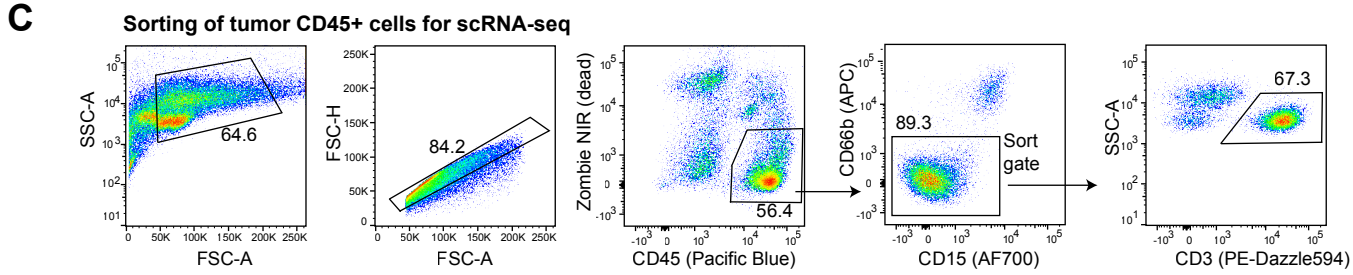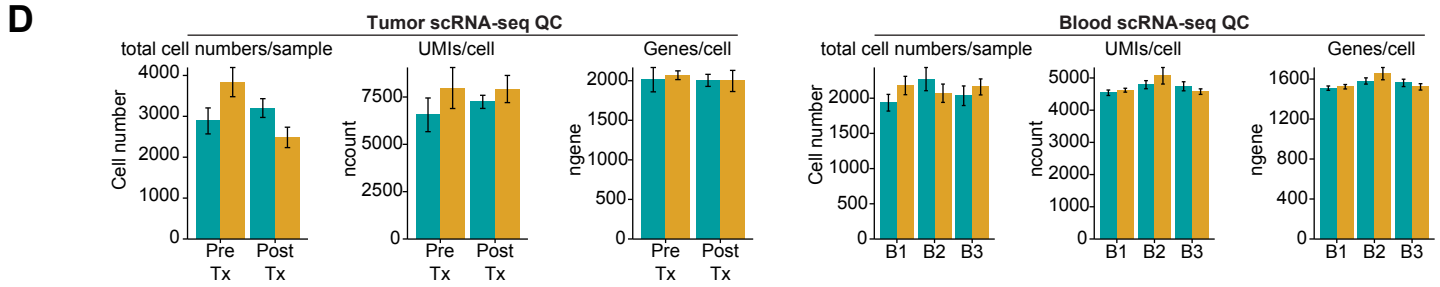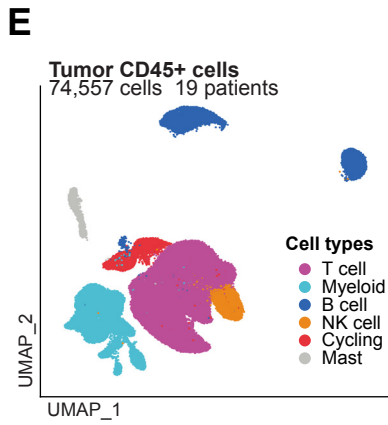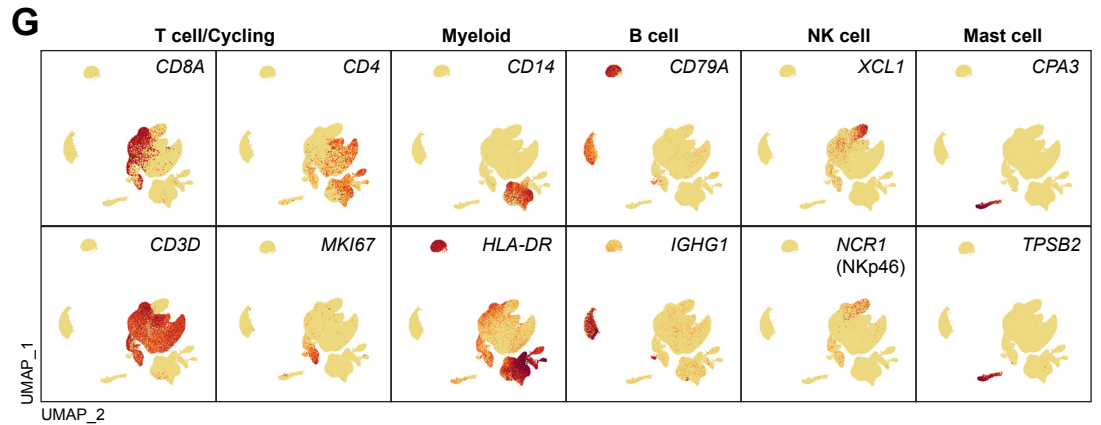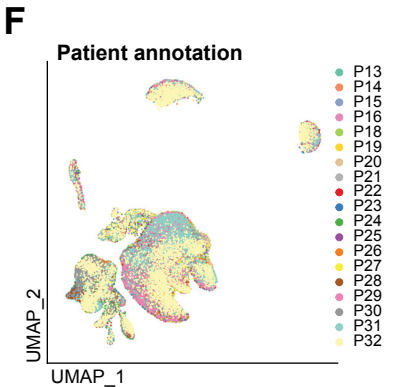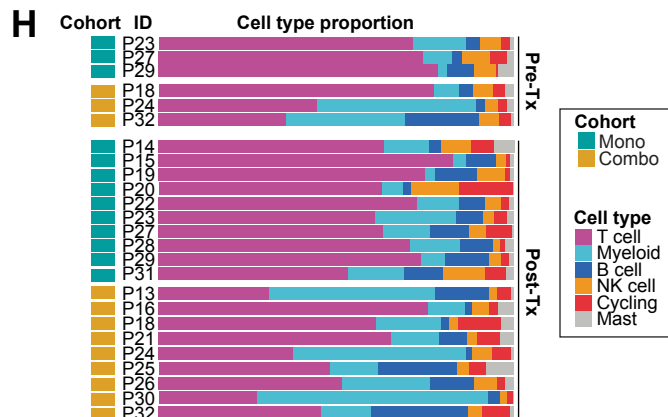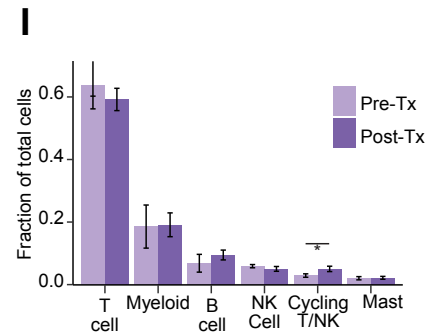

Supplement: NIHMS1816239-supplement-1.pdf [file NIHMS1816239-supplement-1.pdf]

**A**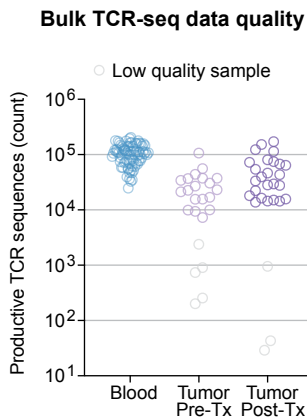**B**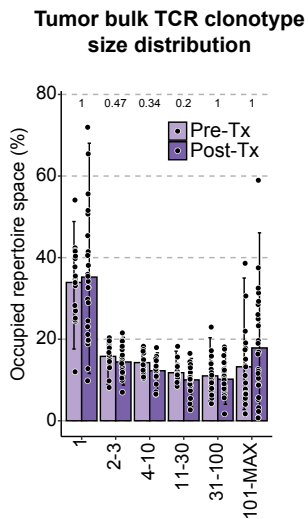**C**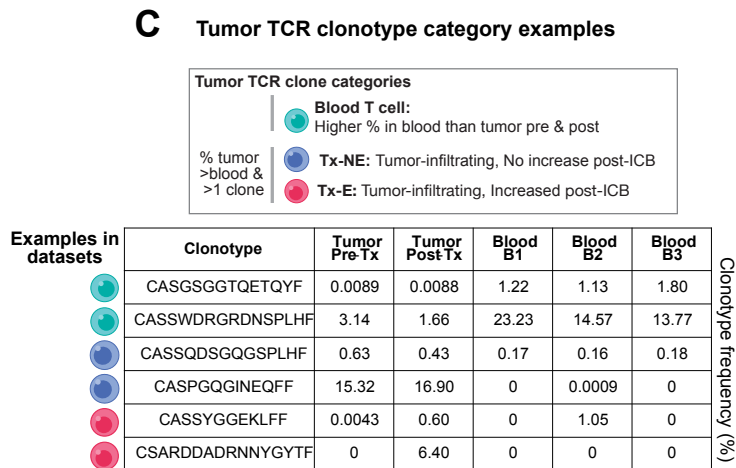**D**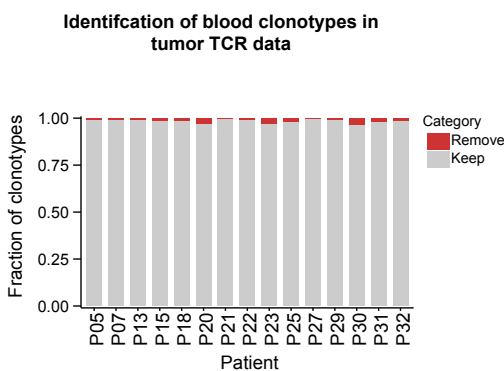**E**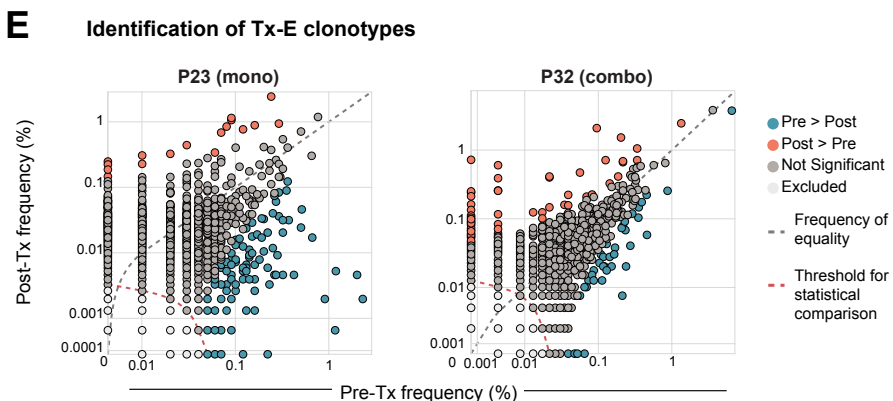**F**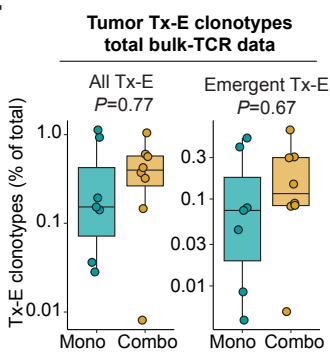**G**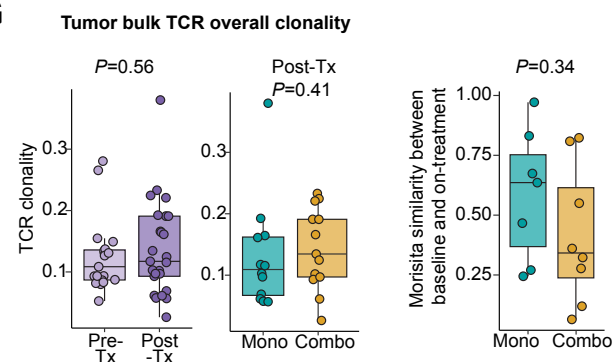**H**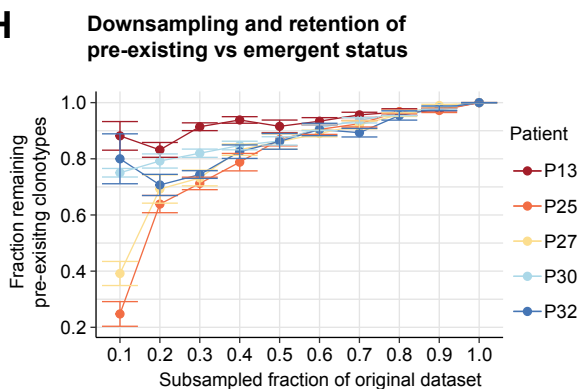**I**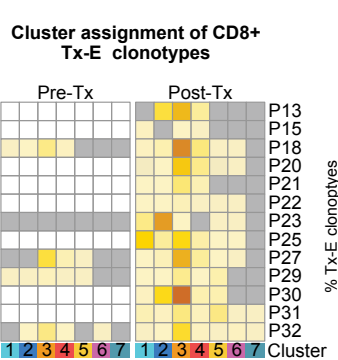**J**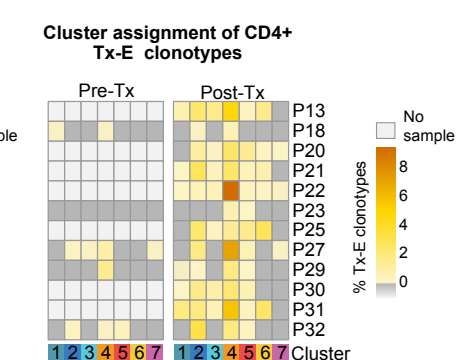

Supplement: NIHMS1816239-supplement-3.pdf [file NIHMS1816239-supplement-3.pdf]
